# Supplementary material
Source: PubMed Central journal article supplement (PMC5210239)
Supplement: 2016_152520-Disclosures_and_Contributions.pdf [file 2016_152520-Disclosures_and_Contributions.pdf]

Haematologica  
HAEMATOL/2016/152520  
Version 3

Myelodysplastic syndrome can propagate from the multipotent  
progenitor compartment

Kevin Rouault-Pierre, Alexander E. Smith, Syed A. Mian, Irene  
Pizzitola, Austin G. Kulasekararaj, Ghulam J. Mufti, and Dominique  
Bonnet

Disclosures: The authors have no conflict of interest to declare

Contributions: K.R.P and A.E.S contributed equally and were involved with all aspects of the study's design, execution, analysis, and manuscript preparation. S.A.M contributed to design, data analysis, and manuscript preparation. A.G.K contributed to clinical data and I.P contributed to experiments and analysis. G.J.M and D.B contributed equally to design, analysis, and manuscript preparation as well as providing project leadership. All authors reviewed the manuscript during its preparation.
